# Supplementary material for: The genome of Eimeria falciformis - reduction and specialization in a single host apicomplexan parasite
Source: PubMed Central journal article supplement (PMC4287421; doi:10.1186/1471-2164-15-696), 2014-08-20

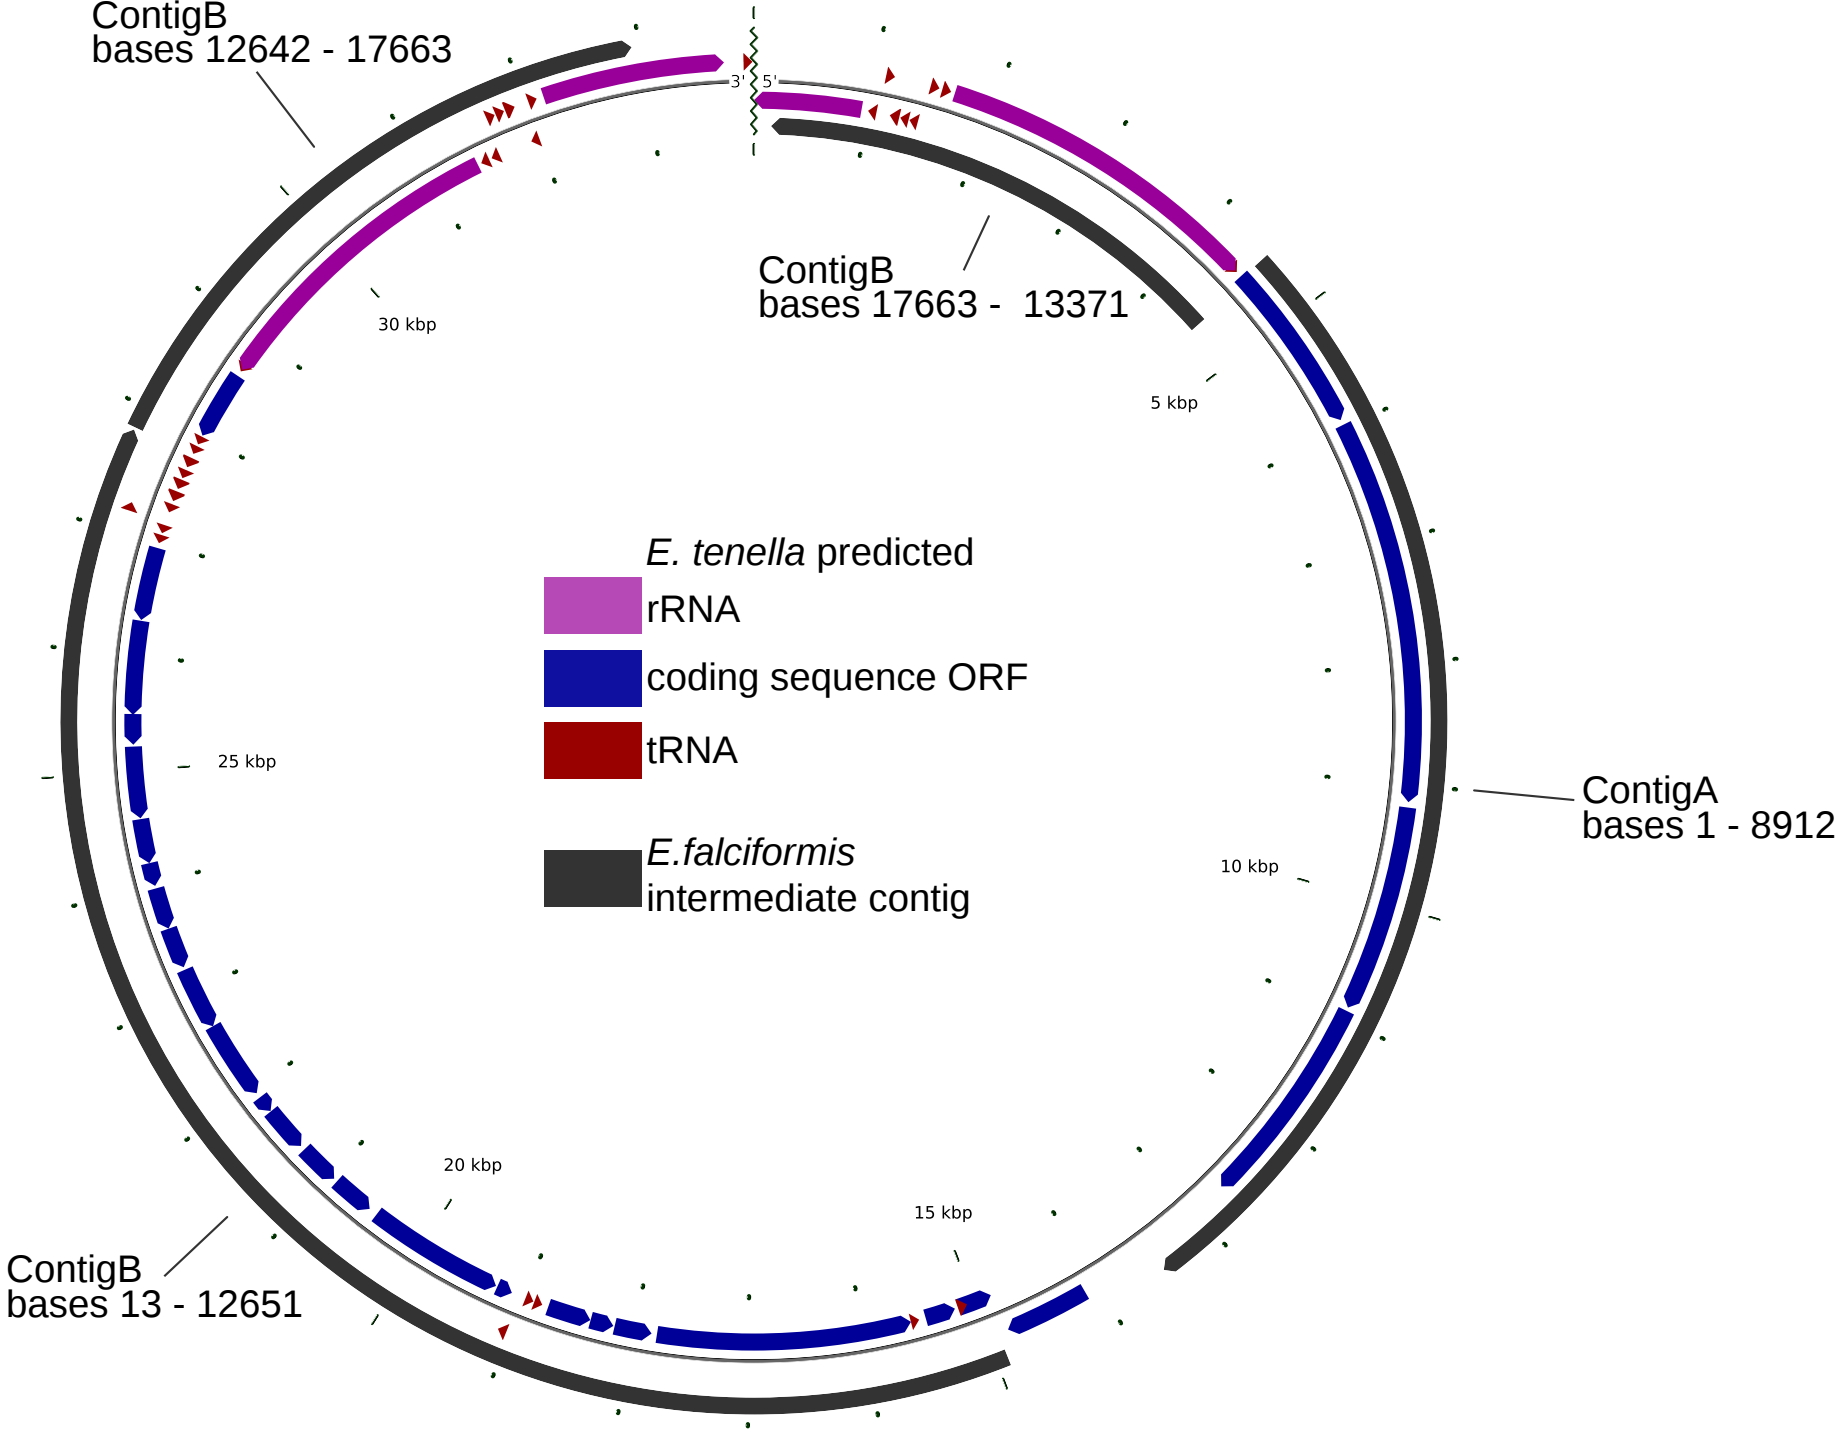

Supplement: 12864_2014_6777_MOESM2_ESM.pdf [file 12864_2014_6777_MOESM2_ESM.pdf]
